# Supplementary material
Source: PubMed Central journal article supplement (PMC3255914)
Supplement: supp_86.1.36_Supplemental_Material.pdf [file supp_86.1.36_Supplemental_Material.pdf]

## Supplemental Material

### Down-modulation of CD8 $\alpha\beta$ is a fundamental activity of primate lentiviral Nef proteins

Anke Specht, Michael Schindler, Clement W. Gnanadurai, Jolie A. Leonard, Kathleen L. Collins, and Frank Kirchhoff

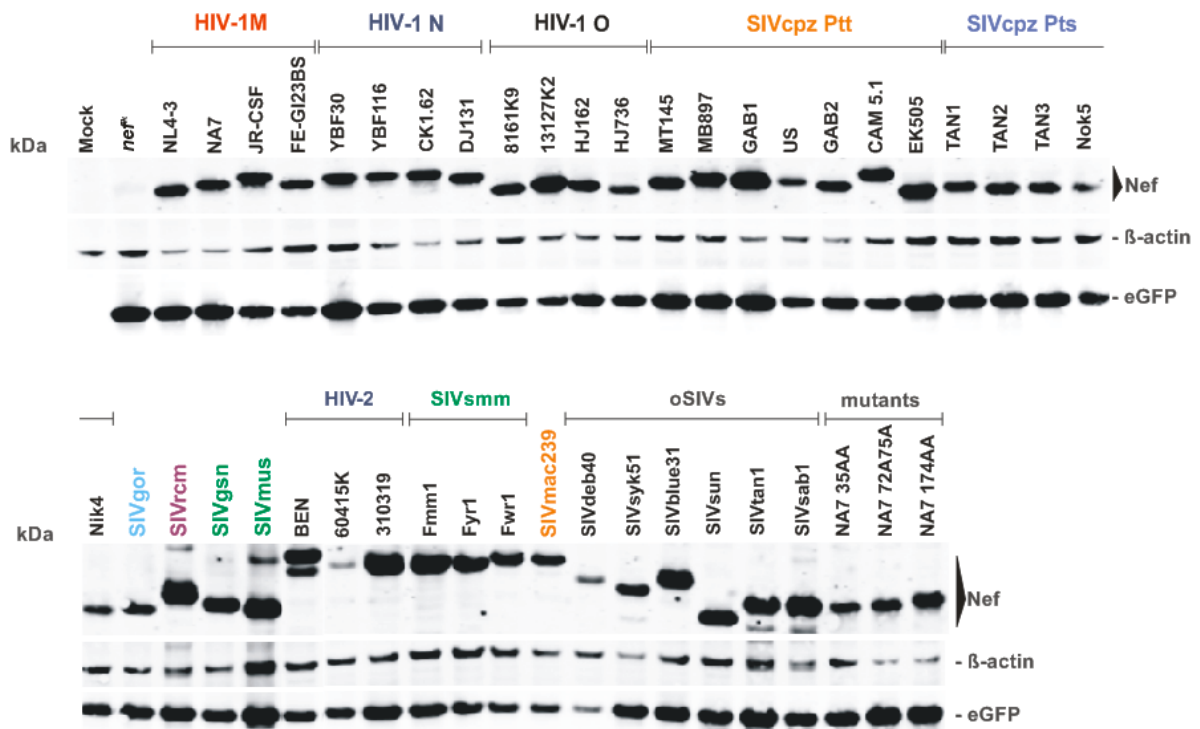

**FIG. S1.** Expression of primate lentiviral Nef proteins. Western blot analysis of cell lysates following transfection of 293T cells with pCGCG vectors expressing AU-1-tagged versions of the indicated Nef proteins. Lysates were probed with an anti AU-1 monoclonal antibody (Covance), anti  $\beta$ -actin polyclonal antibody (Abcam) and anti GFP polyclonal antibody (Abcam) to determine protein expression levels.

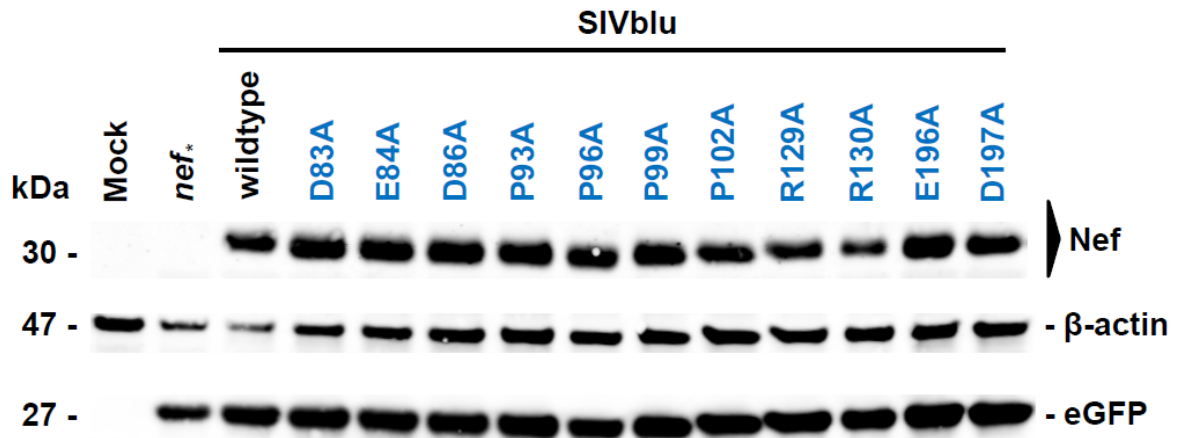

**FIG. S2.** Expression of wild-type and mutant SIVblu Nef proteins. Western blot analysis was performed as described in the legend to Fig. S1.

**Supplementary Table 1.** Modulation of cellular receptors by HIV and SIV *nef* alleles

| Lineage   | Clone    | GenBank<br>Accession # | Species/subspecies                                  | receptor down-modulation (n-fold) |             |       |      |      |
|-----------|----------|------------------------|-----------------------------------------------------|-----------------------------------|-------------|-------|------|------|
|           |          |                        |                                                     | A2-CD8 $\beta$                    | CD8 $\beta$ | MHC-I | CD4  | CD28 |
| HIV-1/M   | NL4-3    | M19921                 | Human ( <i>Homo sapiens</i> )                       | 7.0                               | 6.5         | 2.5   | 6.5  | 1.9  |
| HIV-1/M   | NA7      | DQ242535               | Human ( <i>Homo sapiens</i> )                       | 9.9                               | 12.5        | 2.1   | 9.4  | 3.2  |
| HIV-1/M   | JR-CSF   | M38429                 | Human ( <i>Homo sapiens</i> )                       | 5.7                               | 3.5         | 3.1   | 10.6 | 1.4  |
| HIV-1/N   | YBF30    | AJ006022               | Human ( <i>Homo sapiens</i> )                       | 2.6                               | 3.7         | 1.4   | 7.4  | 1.5  |
| HIV-1/N   | YBF116   | AY536907               | Human ( <i>Homo sapiens</i> )                       | 4.7                               | 5.4         | 2.1   | 5.8  | 2.0  |
| HIV-1/N   | CK1.62   | GQ925929               | Human ( <i>Homo sapiens</i> )                       | 1.3                               | 2.0         | 1.3   | 4.2  | 1.3  |
| HIV-1/N   | DJ131    | AY532635               | Human ( <i>Homo sapiens</i> )                       | 7.9                               | 13.6        | 2.4   | 10.2 | 1.6  |
| HIV-1/O   | MVP8161  | AY536905               | Human ( <i>Homo sapiens</i> )                       | 5.2                               | 13.6        | 2.5   | 7.1  | 1.9  |
| HIV-1/O   | MVP13127 | AY536904               | Human ( <i>Homo sapiens</i> )                       | 6.4                               | 14.1        | 2.6   | 8.1  | 2.3  |
| HIV-1/O   | HJ162    | GQ925932               | Human ( <i>Homo sapiens</i> )                       | 7.1                               | 23.4        | 2.6   | 10.4 | 4.2  |
| HIV-1/O   | HJ736    | GQ925935               | Human ( <i>Homo sapiens</i> )                       | 3.8                               | 5.0         | 2.6   | 9.3  | 1.6  |
| SIVcpzPtt | MT145    | DQ373066               | Central chimpanzee ( <i>Pan t. troglodytes</i> )    | 7.0                               | 11.9        | 2.3   | 9.9  | 2.0  |
| SIVcpzPtt | MB897    | EF535994               | Central chimpanzee ( <i>Pan t. troglodytes</i> )    | 10.6                              | 14.2        | 3.0   | 10.9 | 3.5  |
| SIVcpzPtt | GAB1     | X52154                 | Central chimpanzee ( <i>Pan t. troglodytes</i> )    | 9.7                               | 12.0        | 2.2   | 11.5 | 2.0  |
| SIVcpzPtt | US       | AY536908               | Central chimpanzee ( <i>Pan t. troglodytes</i> )    | 3.9                               | 6.3         | 1.9   | 5.1  | 1.6  |
| SIVcpzPtt | GAB2     | AF382828               | Central chimpanzee ( <i>Pan t. troglodytes</i> )    | 9.2                               | 11.8        | 1.8   | 9.1  | 3.4  |
| SIVcpzPtt | CAM5.1   | AY536911               | Central chimpanzee ( <i>Pan t. troglodytes</i> )    | 10.2                              | 11.7        | 1.4   | 8.2  | 1.7  |
| SIVcpzPtt | EK505    | DQ373065               | Central chimpanzee ( <i>Pan t. troglodytes</i> )    | 9.6                               | 9.8         | 2.1   | 6.6  | 3.0  |
| SIVcpzPts | TAN1     | EF394356               | Eastern chimpanzee ( <i>Pan t. schweinfurthii</i> ) | 7.6                               | 11.2        | 2.1   | 6.6  | 4.8  |
| SIVcpzPts | TAN2     | DQ374657               | Eastern chimpanzee ( <i>Pan t. schweinfurthii</i> ) | 3.5                               | 2.8         | 3.4   | 4.5  | 1.5  |
| SIVcpzPts | TAN3     | DQ374658               | Eastern chimpanzee ( <i>Pan t. schweinfurthii</i> ) | 6.6                               | 8.7         | 2.1   | 7.1  | 3.1  |
| SIVcpzPts | Nok5     | AY536915               | Eastern chimpanzee ( <i>Pan t. schweinfurthii</i> ) | 8.1                               | 12.2        | 1.7   | 9.1  | 3.4  |
| SIVcpzPts | Nik4     | AY536916               | Eastern chimpanzee ( <i>Pan t. schweinfurthii</i> ) | 8.2                               | 11.8        | 1.7   | 6.9  | 3.5  |
| SIVgsn    | CM166    | AF468659               | Greater spot-nosed monkey ( <i>C. nictitans</i> )   | 4.2                               | 7.6         | 2.7   | 10.5 | 6.7  |
| SIVmus    | CMS1085  | AY340700               | Mustached monkey ( <i>Cercopithecus cephus</i> )    | 2.7                               | 4.4         | 2.9   | 6.0  | 2.5  |
| SIVmon    | CML1     | AY340701               | Mona monkey ( <i>Cercopithecus mona</i> )           | 2.0                               | 2.9         | 1.6   | 6.9  | 3.2  |
| SIVgor    | CP2139   | FJ424866               | West. lowland gorilla ( <i>G. g. gorilla</i> )      | 6.6                               | 18.2        | 2.2   | 9.2  | 2.2  |
| SIVmac    | 239      | M33262                 | Rhesus macaque ( <i>Macaca mulatta</i> )            | 15.4                              | 18.5        | 2.6   | 6.0  | 4.4  |
| HIV-2     | BEN      | M30502                 | Human ( <i>Homo sapiens</i> )                       | 10.7                              | 21.8        | 3.8   | 9.1  | 10.4 |
| HIV-2     | CBL-23   | DQ222472               | Human ( <i>Homo sapiens</i> )                       | 4.6                               | 1.9         | 5.1   | 1.8  | 1.1  |
| HIV-2     | 60415K   | DQ092764               | Human ( <i>Homo sapiens</i> )                       | 5.8                               | 9.8         | 3.4   | 8.4  | 1.5  |
| HIV-2     | 310319   | DQ092766               | Human ( <i>Homo sapiens</i> )                       | 3.2                               | 4.5         | 3.0   | 11.5 | 2.5  |
| SIVsmm    | FMm1     | DQ092762               | Sooty mangabey ( <i>Cercocebus atys</i> )           | 10.5                              | 10.3        | 2.6   | 3.7  | 2.1  |
| SIVsmm    | FYr1     | DQ092760               | Sooty mangabey ( <i>Cercocebus atys</i> )           | 12.8                              | 12.2        | 1.9   | 7.1  | 4.8  |
| SIVsmm    | FWr1     | DQ092758               | Sooty mangabey ( <i>Cercocebus atys</i> )           | 12.1                              | 12.5        | 2.0   | 5.9  | 6.4  |
| SIVrcm    | GB1      | AF382829               | Red-capped mangabey ( <i>Cercocebus torquatus</i> ) | 4.2                               | 3.0         | 1.2   | 2.1  | 1.2  |
| SIVdeb    | CM40     | AY523865               | De Brazza monkey ( <i>Cercopithecus neglectus</i> ) | 9.2                               | 8.3         | 1.6   | 5.7  | 5.6  |
| SIVsyk    | KE51     | AY523867               | Sykes monkey ( <i>Cercopithecus albogularis</i> )   | 9.6                               | 11.9        | 1.5   | 4.0  | 4.4  |
| SIVblu    | KE31     | DQ222474               | Blue monkey ( <i>Cercopithecus mitis</i> )          | 12.9                              | 11.1        | 2.8   | 4.3  | 4.8  |
| SIVsun    | sol-36   | DQ222476               | Sun-tailed monkey ( <i>Cercopithecus solatus</i> )  | 3.2                               | 3.0         | 2.0   | 5.5  | 2.5  |
| SIVtan    | 1        | AF395566               | Tantalus monkey ( <i>Chlorocebus tantalus</i> )     | 11.7                              | 14.2        | 1.5   | 4.9  | 3.7  |
| SIVsab    | 1        | U04005                 | Green monkey ( <i>Chlorocebus sabaeus</i> )         | 10.1                              | 8.4         | 2.8   | 3.4  | 3.6  |

The Nef-mediated *n*-fold down-modulation of A2-CD8 $\beta$ , CD8 $\beta$ , MHC-I, CD4 and CD28 was calculated by dividing the MFI of cells infected with a *nef*-deficient HIV-1 expressing a specific range of green fluorescence by the corresponding number obtained for cells infected with HIV-1 constructs coexpressing Nef and eGFP.
